# Supplementary material for: High PD-L1/IDO-2 and PD-L2/IDO-1 Co-Expression Levels Are Associated with Worse Overall Survival in Resected Non-Small Cell Lung Cancer Patients
Source: PubMed Central journal article supplement (PMC7918978; doi:10.3390/genes12020273), 2021-02-15
Supplement: genes-12-00273-s001.pdf [file genes-12-00273-s001.pdf]

**Table S1. Univariate and multivariate analyses for recurrence-free survival (RFS) in adenocarcinomas (N.120)**

|                       |                | RFS Adenocarcinomas |      |           |                  |                       |           |              |
|-----------------------|----------------|---------------------|------|-----------|------------------|-----------------------|-----------|--------------|
|                       |                | Univariate Analysis |      |           |                  | Multivariate Analysis |           |              |
| Variables             |                | At risk             | HR   | 95% CI    | * <i>p</i>       | HR                    | 95% CI    | * <i>p</i>   |
| <b>Age</b>            | <60            | 26                  |      |           |                  |                       |           |              |
|                       | ≥60            | 94                  | 0.94 | 0.51–1.71 | 0.84             |                       |           |              |
| <b>Sex</b>            | F (Ref)        | 40                  |      |           |                  |                       |           |              |
|                       | M              | 80                  | 1.07 | 0.62–1.84 | 0.78             |                       |           |              |
| <b>Smoking</b>        | Never (Ref)    | 15                  | 1    |           |                  |                       |           |              |
|                       | Current        | 44                  | 2.67 | 1.02–6.94 | <b>0.04</b>      | 3.26                  | 1.15–9.22 | <b>0.02</b>  |
|                       | Former         | 61                  | 1.76 | 0.68–4.57 | 0.24             | 1.69                  | 0.69–4.61 | 0.30         |
| <b>p-Stage</b>        | I (Ref)        | 73                  | 1    |           |                  |                       |           |              |
|                       | II             | 26                  | 2.14 | 1.15–3.98 | <b>0.01</b>      | 2.63                  | 1.33–5.20 | <b>0.005</b> |
|                       | III            | 21                  | 1.93 | 1.02–3.64 | <b>0.04</b>      | 2.09                  | 1.05–4.15 | <b>0.03</b>  |
| <b>PD-1</b>           | Low <4fc (Ref) | 104                 |      |           |                  |                       |           |              |
|                       | High ≥ 4fc     | 16                  | 1.21 | 0.72–2.02 | 0.46             |                       |           |              |
| <b>PD-L1</b>          | Low <4fc (Ref) | 52                  |      |           |                  |                       |           |              |
|                       | High ≥ 4fc     | 68                  | 1.45 | 0.95–2.21 | 0.08             |                       |           |              |
| <b>PD-L2</b>          | Low <4fc (Ref) | 72                  |      |           |                  |                       |           |              |
|                       | High ≥ 4fc     | 48                  | 1.80 | 1.08–3.00 | <b>0.02</b>      |                       |           |              |
| <b>IDO-1</b>          | Low <4fc (Ref) | 72                  |      |           |                  |                       |           |              |
|                       | High ≥ 4fc     | 48                  | 1.45 | 0.87–2.41 | 0.15             |                       |           |              |
| <b>IDO-2</b>          | Low <4fc (Ref) | 95                  |      |           |                  |                       |           |              |
|                       | High ≥ 4fc     | 25                  | 2.24 | 1.27–3.94 | <b>0.005</b>     |                       |           |              |
| <b>INFγ</b>           | Low <4fc (Ref) | 100                 |      |           |                  |                       |           |              |
|                       | High ≥ 4fc     | 20                  | 2.09 | 1.14–3.81 | <b>0.01</b>      |                       |           |              |
| <b>PD-L1/IDO-2</b>    | Low <4fc (Ref) | 101                 |      |           |                  |                       |           |              |
|                       | High ≥ 4fc     | 19                  | 2.27 | 1.22–4.22 | <b>&lt;0.001</b> |                       |           |              |
| <b>PD-L2/IDO-1</b>    | Low <4fc (Ref) | 90                  |      |           |                  |                       |           |              |
|                       | High ≥ 4fc     | 30                  | 2.07 | 1.22–3.55 | <b>0.04</b>      |                       |           |              |
| <b>PDL1/PDL2/INFγ</b> | Low <4fc (Ref) | 102                 |      |           |                  |                       |           |              |
|                       | High ≥ 4fc     | 18                  | 2.43 | 1.30–4.51 | <b>0.005</b>     |                       |           |              |

Abbreviations: HR, Hazard Ratio; CI, Confidence Interval PD-1, programmed cell death 1; PD-L1, programmed cell death 1 ligand 1; PD-L2, programmed cell death 1 ligand 2; IDO-1, indoleamine 2,3-dioxygenase 1; IDO-2, indoleamine 2,3-dioxygenase 2; INFγ, Interferon-γ; significant *p* value ≤ 0.05 in bold.

**Table S2. Univariate and multivariate analyses for overall survival (OS) in adenocarcinomas (N.120)**

|                                         |             | OS Adenocarcinomas  |      |           |              |                       |           |             |
|-----------------------------------------|-------------|---------------------|------|-----------|--------------|-----------------------|-----------|-------------|
|                                         |             | Univariate Analysis |      |           |              | Multivariate Analysis |           |             |
| Variables                               |             | At risk             | HR   | 95% CI    | * <i>p</i>   | HR                    | 95% CI    | * <i>p</i>  |
| <b>Age</b>                              | <60         | 26                  |      |           |              |                       |           |             |
|                                         | ≥60         | 94                  | 0.94 | 0.51–1.71 | 0.84         |                       |           |             |
| <b>Sex</b>                              | F (Ref)     | 40                  |      |           |              |                       |           |             |
|                                         | M           | 80                  | 1.84 | 1.02–3.30 | <b>0.04</b>  | 1.90                  | 1.05–3.46 | <b>0.03</b> |
| <b>Smoking</b>                          | Never (Ref) | 15                  | 1    |           |              |                       |           |             |
|                                         | Current     | 44                  | 1.90 | 0.77–4.67 | 0.15         |                       |           |             |
|                                         | Former      | 61                  | 1.64 | 0.68–3.93 | 0.26         |                       |           |             |
| <b>p-Stage</b>                          | I (Ref)     | 73                  | 1    |           |              |                       |           |             |
|                                         | II          | 26                  | 1.75 | 0.95–3.24 | 0.07         |                       |           |             |
|                                         | III         | 21                  | 1.93 | 0.90–3.18 | 0.10         |                       |           |             |
| <b>PD-1</b>                             | Low (Ref)   | <4fc<br>104         |      |           |              |                       |           |             |
|                                         | High ≥ 4fc  | 16                  | 1.70 | 0.86–3.36 | 0.12         |                       |           |             |
| <b>PD-L1</b>                            | Low (Ref)   | <4fc<br>52          |      |           |              |                       |           |             |
|                                         | High ≥ 4fc  | 68                  | 1.70 | 1.01–2.87 | <b>0.04</b>  |                       |           |             |
| <b>PD-L2</b>                            | Low (Ref)   | <4fc<br>72          |      |           |              |                       |           |             |
|                                         | High ≥ 4fc  | 48                  | 1.60 | 0.96–2.66 | 0.06         |                       |           |             |
| <b>IDO-1</b>                            | Low (Ref)   | <4fc<br>72          |      |           |              |                       |           |             |
|                                         | High ≥ 4fc  | 48                  | 1.64 | 0.99–2.72 | <b>0.05</b>  |                       |           |             |
| <b>IDO-2</b>                            | Low (Ref)   | <4fc<br>95          |      |           |              |                       |           |             |
|                                         | High ≥ 4fc  | 25                  | 1.54 | 0.85–2.76 | 0.14         |                       |           |             |
| <b>INF<math>\gamma</math></b>           | Low (Ref)   | <4fc<br>100         |      |           |              |                       |           |             |
|                                         | High ≥ 4fc  | 20                  | 1.72 | 0.93–3.19 | 0.08         |                       |           |             |
| <b>PD-L1/IDO-2</b>                      | Low (Ref)   | <4fc<br>101         |      |           |              |                       |           |             |
|                                         | High ≥ 4fc  | 19                  | 1.98 | 1.07–3.67 | <b>0.02</b>  |                       |           |             |
| <b>PD-L2/IDO-1</b>                      | Low (Ref)   | <4fc<br>90          |      |           |              |                       |           |             |
|                                         | High ≥ 4fc  | 30                  | 2.24 | 1.32–3.79 | <b>0.003</b> |                       |           |             |
| <b>PDL1/PDL2/INF<math>\gamma</math></b> | Low (Ref)   | <4fc<br>102         |      |           |              |                       |           |             |
|                                         | High ≥ 4fc  | 18                  | 1.92 | 1.02–3.63 | <b>0.04</b>  |                       |           |             |

Abbreviations: HR, Hazard Ratio; CI, Confidence Interval; PD-1, programmed cell death 1; PD-L1, programmed cell death 1 ligand 1; PD-L2, programmed cell death 1 ligand 2; IDO-1, indoleamine 2,3-dioxygenase 1; IDO-2, indoleamine 2,3-dioxygenase 2; INF $\gamma$ , Interferon- $\gamma$ ; significant *p* value  $\leq 0.05$  in bold.
